# Supplementary material for: Physalin B inhibits PDGF-BB-induced VSMC proliferation, migration and phenotypic transformation by activating the Nrf2 pathway
Source: Royal Society of Chemistry journal article supplement (doi:10.1039/d1fo01926k), 2021-01-01
Supplement: d1fo01926k2.pdf [file d1fo01926k2.pdf]

### Supplementary Figure 1

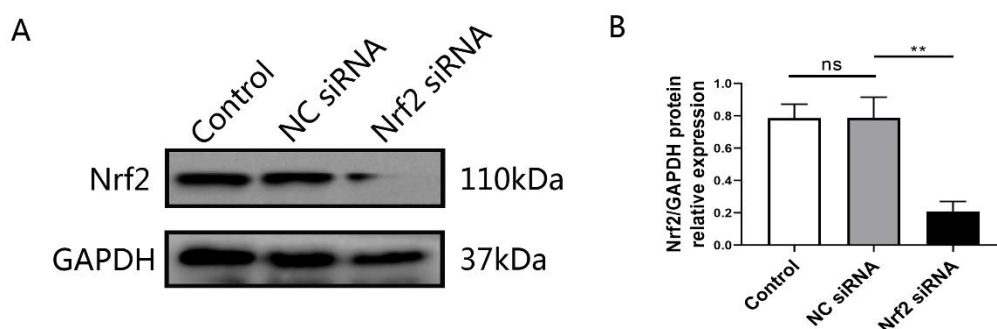

**Supplementary Figure 1. Western blotting detects the effect of siRNA mediated Nrf2 downregulation.** (A). Representative blot pictures. (B). Semi-quantitative analysis of Nrf2 expression levels in each group (n=3). \*\* $p < 0.01$ ; ns,  $p > 0.05$ .

### Supplementary Figure 2

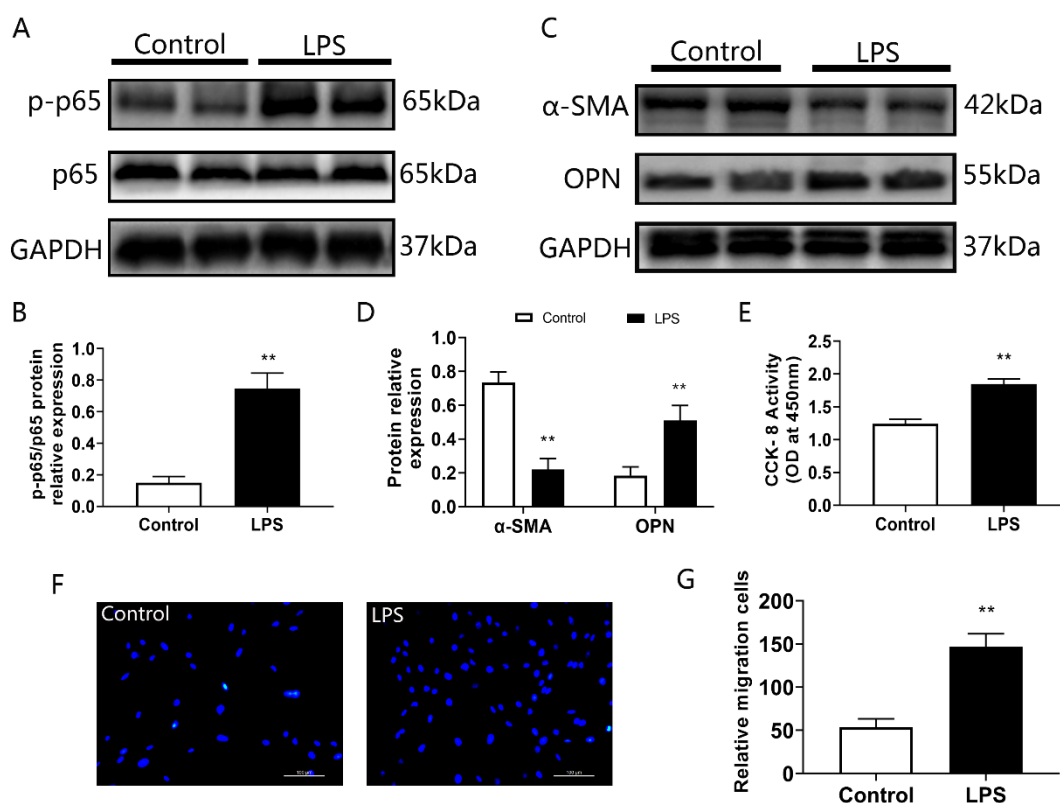

**Supplementary Figure 2. The effect of lipopolysaccharide on VSMC proliferation, migration, phenotype transformation and NF-κB activity.** (A-B). Western blotting was used to measure the phosphorylation level of NF-κB p65 in VSMC (n=3). (C-D). Western blotting was used to examine the expression of α-SMA and OPN in VSMC (n=4). (E). CCK-8 assay was performed to detect the proliferation of VSMC (n=5). (F-G). Transwell assay was used to determine the migration of VSMC (n=5). \*\* $p < 0.01$  vs. Control group.
